# Supplementary material
Source: publisher site journal article supplement (https://kjim.org/upload/media/kjim-2023-303-Supplementary-Table-4.pdf)
Supplement: Supplementary file 1 [file kjim-2023-303-Supplementary-Table-4.pdf]

**Supplementary Table 4. Baseline characteristics of metformin users and non-users after propensity score matching in women**

| Variable                   | Women                       |                                 | <i>p</i> value |
|----------------------------|-----------------------------|---------------------------------|----------------|
|                            | Metformin users (n = 1,924) | Metformin non-users (n = 1,924) |                |
| Age group (yr)             |                             |                                 | > 0.999        |
| 18–24                      | 1 (0.1)                     | 1 (0.1)                         |                |
| 25–34                      | 6 (0.3)                     | 6 (0.3)                         |                |
| 35–44                      | 39 (2.0)                    | 39 (2.0)                        |                |
| 45–54                      | 103 (5.4)                   | 103 (5.4)                       |                |
| 55–64                      | 178 (9.3)                   | 178 (9.3)                       |                |
| 65–74                      | 500 (26.0)                  | 500 (26.0)                      |                |
| > 75                       | 1,097 (57.0)                | 1,097 (57.0)                    |                |
| Age (yr)                   | 76 (69–81)                  | 76 (69–81)                      | > 0.999        |
| Region, metropolitan       | 53 (39.1)                   | 784 (40.8)                      | 0.31           |
| Nationality, Korean        | 1,914 (99.5)                | 1,916 (99.6)                    | 0.64           |
| Household income           |                             |                                 | 0.63           |
| 0 (lowest)                 | 233 (12.1)                  | 243 (12.6)                      |                |
| 1                          | 311 (16.2)                  | 295 (15.3)                      |                |
| 2                          | 185 (9.6)                   | 208 (10.8)                      |                |
| 3                          | 258 (13.4)                  | 255 (13.3)                      |                |
| 4                          | 317 (16.5)                  | 336 (17.5)                      |                |
| 5 (highest)                | 620 (32.2)                  | 587 (30.5)                      |                |
| Disability                 |                             |                                 | < 0.01         |
| No                         | 1,636 (85.0)                | 1,512 (78.6)                    |                |
| Physical disability        | 280 (14.6)                  | 399 (20.7)                      |                |
| Internal disability        | 8 (0.4)                     | 13 (0.7)                        |                |
| Lesion site of TB          |                             |                                 | 0.03           |
| Pulmonary                  | 1,652 (85.9)                | 1,603 (83.3)                    |                |
| Extra-pulmonary            | 272 (14.1)                  | 321 (16.7)                      |                |
| TB history                 |                             |                                 | 0.64           |
| New case                   | 1,771 (92.1)                | 1,763 (91.6)                    |                |
| Previously treated TB      | 153 (8.0)                   | 161 (8.4)                       |                |
| PPM hospital               | 1,442 (75.0)                | 1,469 (76.4)                    | 0.31           |
| AFB smear positivity       | 721 (37.5)                  | 660 (34.3)                      | 0.12           |
| Culture positivity         | 951 (49.4)                  | 895 (46.5)                      | 0.19           |
| Charlson Comorbidity Index |                             |                                 | > 0.999        |
| 0                          | 435 (22.6)                  | 435 (22.6)                      |                |
| 1                          | 861 (44.8)                  | 861 (44.8)                      |                |
| 2                          | 136 (7.1)                   | 136 (7.1)                       |                |
| ≥ 3                        | 492 (25.6)                  | 492 (25.6)                      |                |
| Comorbidity                |                             |                                 |                |
| Transplantation            | 3 (0.2)                     | 8 (0.4)                         | 0.23           |
| HIV                        | 0 (0.0)                     | 0 (0.0)                         |                |
| Cancer                     | 34 (1.8)                    | 44 (2.3)                        | 0.25           |

Supplementary Table 4. Continued

| Variable                          | Women                       |                                 | p value |
|-----------------------------------|-----------------------------|---------------------------------|---------|
|                                   | Metformin users (n = 1,924) | Metformin non-users (n = 1,924) |         |
| Notification year                 |                             |                                 | > 0.999 |
| 2011                              | 288 (15.0)                  | 295 (15.3)                      |         |
| 2012                              | 271 (14.1)                  | 267 (13.9)                      |         |
| 2013                              | 227 (11.8)                  | 224 (11.6)                      |         |
| 2014                              | 298 (15.5)                  | 297 (15.4)                      |         |
| 2015                              | 282 (14.7)                  | 283 (14.7)                      |         |
| 2016                              | 280 (14.6)                  | 280 (14.6)                      |         |
| 2017                              | 278 (14.4)                  | 278 (14.5)                      |         |
| Anti-diabetic treatment           |                             |                                 |         |
| Sulfonylurea                      | 1,069 (55.6)                | 1,166 (60.6)                    | < 0.01  |
| Insulin                           | 82 (4.3)                    | 178 (9.3)                       | < 0.01  |
| Other DM medication <sup>a)</sup> | 1,150 (59.8)                | 1,213 (63.1)                    | 0.04    |
| Follow-up duration (d)            | 212 (183–283)               | 214 (182–286)                   | 0.78    |
| Treatment outcome                 |                             |                                 | 0.01    |
| Treatment success/failure         | 1,728 (89.8)                | 1,672 (86.9)                    |         |
| Death due to all causes           | 196 (10.2)                  | 252 (13.1)                      |         |
| Cause of death                    |                             |                                 | 0.37    |
| TB-related deaths                 | 45 (2.3)                    | 49 (2.6)                        |         |
| Non-TB-related deaths             | 151 (7.9)                   | 203 (10.6)                      |         |

Values are presented as number (%) or median (interquartile range).

AFB, acid-fast bacilli; DM, diabetes mellitus; HIV, human immunodeficiency virus; PPM, public-private mix; TB, tuberculosis.

<sup>a)</sup>Other DM medications include dipeptidyl peptidase-4 inhibitors, glinide, thiazolidinedione, glucagon-like peptide-1, alpha-glucosidase inhibitors, and sodium-glucose cotransporter-2 inhibitors.
